# Supplementary material
Source: PubMed Central journal article supplement (PMC1955803)
Supplement: pnas_0702199104_1.pdf [file pnas_0702199104_1.pdf]

**Table 1. Data collection, refinement statistics, and structural characteristics of InIA-mutant/hEC1 complexes**

|                                                         | InIA <sub>WT</sub> /hEC1 <sup>†</sup>                 | InIA <sub>Y369A</sub> /hEC1                           | InIA <sub>G194S+S</sub> /hEC1                         | InIA <sub>S192N</sub> /hEC1 <sup>‡</sup>              | InIA <sub>S192N-Y369S</sub> /hEC1 <sup>‡</sup>        | InIA <sub>S192N-G194S+S</sub> /hEC1 | InIA <sub>G194S+S-Y369S</sub> /hEC1 |
|---------------------------------------------------------|-------------------------------------------------------|-------------------------------------------------------|-------------------------------------------------------|-------------------------------------------------------|-------------------------------------------------------|-------------------------------------|-------------------------------------|
| Data collection*                                        |                                                       |                                                       |                                                       |                                                       |                                                       |                                     |                                     |
| Space group                                             | <i>P</i> 2 <sub>1</sub> 2 <sub>1</sub> 2 <sub>1</sub> | <i>P</i> 1                          | <i>P</i> 1                          |
| Cell constants                                          |                                                       |                                                       |                                                       |                                                       |                                                       |                                     |                                     |
| <i>a</i> , <i>b</i> , <i>c</i> (Å)                      | 55.4, 86.8, 110.7                                     | 55.3, 84.6, 108.3                                     | 55.2, 88.5, 110.5                                     | 55.5, 68.9, 132.4                                     | 55.4, 87.4, 111.0                                     | 44.9, 54.1, 68.6                    | 45.0, 54.3, 68.6                    |
| $\alpha$ , $\beta$ , $\gamma$ (°)                       | 90, 90, 90                                            | 90, 90, 90                                            | 90, 90, 90                                            | 90, 90, 90                                            | 90, 90, 90                                            | 74.7, 80.7, 67.7                    | 75.0, 80.8, 67.4                    |
| Resolution, Å                                           | 25-1.8 (1.86-1.80)                                    | 40-1.6 (1.63-1.60)                                    | 40-2.0 (2.1-2.0)                                      | 40-1.7 (1.76-1.70)                                    | 50-1.9 (1.97-1.90)                                    | 50-1.7 (1.77-1.70)                  | 50-1.8 (1.86-1.80)                  |
| <i>R</i> <sub>merge</sub> (%)                           | 6 (39)                                                | 5 (29)                                                | 12 (37)                                               | 6 (28)                                                | 8 (42)                                                | 6 (52)                              | 6 (51)                              |
| <i>I</i> / $\sigma$ <sub><i>I</i></sub>                 | 14 (3)                                                | 29 (6)                                                | 9 (4)                                                 | 20 (4)                                                | 17 (3)                                                | 16 (2)                              | 12 (2)                              |
| Completeness (%)                                        | 92 (84)                                               | 99 (95)                                               | 96 (92)                                               | 99 (95)                                               | 97 (86)                                               | 91 (77)                             | 94 (75)                             |
| Redundancy                                              | 6 (5)                                                 | 8 (8)                                                 | 5 (4)                                                 | 6 (6)                                                 | 12 (4)                                                | 5 (4)                               | 5 (4)                               |
| <b>Refinement</b>                                       |                                                       |                                                       |                                                       |                                                       |                                                       |                                     |                                     |
| Resolution, Å                                           | 1.8                                                   | 1.6                                                   | 2.0                                                   | 1.7                                                   | 1.9                                                   | 1.7                                 | 1.8                                 |
| No. reflections                                         | 41618                                                 | 60684                                                 | 37285                                                 | 50104                                                 | 43193                                                 | 56061                               | 47450                               |
| <i>R</i> <sub>work</sub> / <i>R</i> <sub>free</sub> (%) | 17/22                                                 | 15/19                                                 | 19/28                                                 | 16/21                                                 | 15/22                                                 | 17/22                               | 16/22                               |
| No. atoms                                               |                                                       |                                                       |                                                       |                                                       |                                                       |                                     |                                     |

|                                   | <b>InIA<sub>WT</sub>/hEC1<sup>†</sup></b> | <b>InIA<sub>Y369A</sub>/hEC1</b> | <b>InIA<sub>G194S+S</sub>/hEC1</b> | <b>InIA<sub>S192N</sub>/hEC1<sup>‡</sup></b> | <b>InIA<sub>S192N-Y369S</sub>/hEC1<sup>‡</sup></b> | <b>InIA<sub>S192N-G194S+S</sub>/hEC1</b> | <b>InIA<sub>G194S+S-Y369S</sub>/hEC1</b> |
|-----------------------------------|-------------------------------------------|----------------------------------|------------------------------------|----------------------------------------------|----------------------------------------------------|------------------------------------------|------------------------------------------|
| Protein                           | 4577                                      | 4645                             | 4524                               | 4704                                         | 4630                                               | 4797                                     | 4691                                     |
| Ca <sup>2+</sup> /Cl <sup>-</sup> | 2/3                                       | 0/0                              | 1/1                                | 2/4                                          | 2/2                                                | 1/1                                      | 1/1                                      |
| Water                             | 541                                       | 801                              | 605                                | 697                                          | 845                                                | 723                                      | 783                                      |
| B-factors<br>mean                 | 24                                        | 11                               | 18                                 | 10                                           | 18                                                 | 14                                       | 18                                       |
| Wilson<br>rmsd                    | 23                                        | 16                               | 23                                 | 14                                           | 21                                                 | 19                                       | 15                                       |
| Bond<br>lengths, Å                | 0.018                                     | 0.022                            | 0.024                              | 0.025                                        | 0.022                                              | 0.024                                    | 0.022                                    |
| Bond<br>angles, °                 | 1.8                                       | 1.8                              | 2.1                                | 2.0                                          | 1.7                                                | 2.0                                      | 1.9                                      |
| <b>Analysis<sup>§</sup></b>       |                                           |                                  |                                    |                                              |                                                    |                                          |                                          |
| rmsd (InIA)                       | -                                         | 0.43                             | 0.39                               | 0.59                                         | 0.30                                               | 0.32                                     | 0.24                                     |
| rmsd<br>(hEC1)                    | -                                         | 0.47                             | 0.28                               | 0.46                                         | 0.24                                               | 0.42                                     | 0.41                                     |
| rmsd<br>(complex)                 | -                                         | 0.64                             | 0.30                               | 0.61                                         | 0.31                                               | 0.50                                     | 0.57                                     |

<sup>\*</sup>Numbers in parentheses indicate values corresponding to the shell of highest resolution.

<sup>†</sup> Schubert WD, Urbanke C, Ziehm T, Beier V, Machner MP, Domann E, Wehland J, Chakraborty T, Heinz DW (2002) *Cell* 111:825-836.

<sup>‡</sup>Wollert T, Pasche B, Rochon M, Deppenmeier S, van den Heuvel J, Gruber AD, Heinz DW, Lengling A, Schubert WD (2007) *Cell* 129:891-902.

<sup>§</sup> rmsd values were calculated using main chain atoms.
